# Supplementary material for: Efficient photocatalysis with graphene oxide/Ag/Ag2S–TiO2 nanocomposites under visible light irradiation
Source: PubMed Central journal article supplement (PMC9078160; doi:10.1039/c7ra13501g), 2018-02-05
Supplement: RA-008-C7RA13501G-s001.pdf [file RA-008-C7RA13501G-s001.pdf]

*Supporting Information for*

# Efficient photocatalysis with graphene oxide/Ag/Ag<sub>2</sub>S-TiO<sub>2</sub> nanocomposites under visible light irradiation†

*Shuang Shuang,<sup>a</sup> Ruitao Lv,<sup>b</sup> Xiaoyang Cui,<sup>a</sup> Zheng Xie,<sup>a, c</sup> Jian Zheng<sup>d</sup> and Zhengjun Zhang<sup>b\*</sup>*

- a. State Key Laboratory of New Ceramics and Fine Processing, School of Materials Science and Engineering, Tsinghua University, Beijing 100084, China
- b. Key Laboratory of Advanced Materials (MOE), School of Materials Science and Engineering, Tsinghua University, Beijing 100084, China
- c. High-Tech Institute of Xi'an, Xi'an 710025, China
- d. Department of Chemistry, University of Oslo, Sem Sælands vei 26, 0371 Oslo, Norway

\* Addresses correspondence to [zjzhang@tsinghua.edu.cn](mailto:zjzhang@tsinghua.edu.cn) (Z.J.Z.)

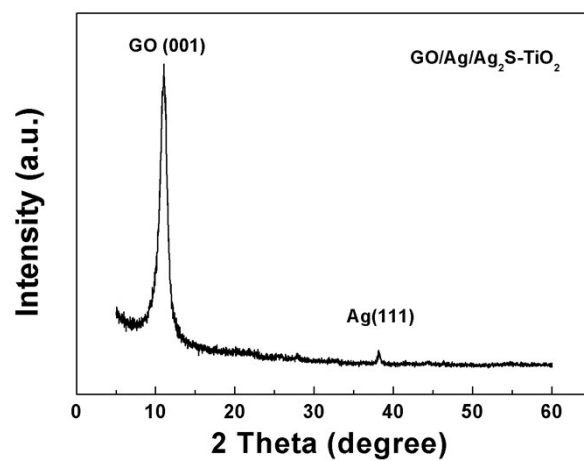

**Figure S1.** XRD spectrum of GO/Ag/Ag<sub>2</sub>S-TiO<sub>2</sub> sample.

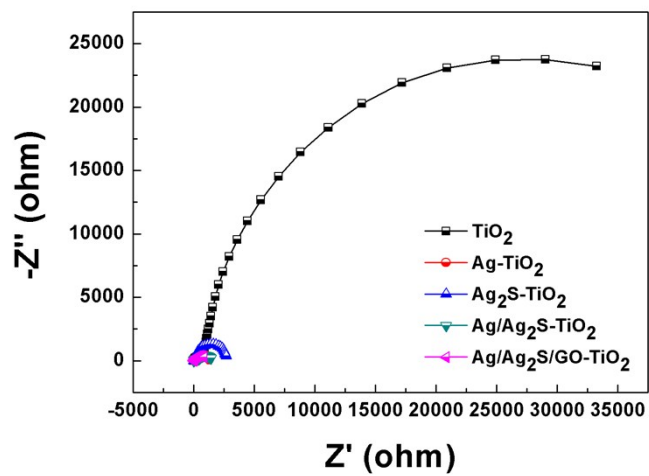

**Figure S2.** Full Nyquist plots under visible light at open circuit voltage of all decorated sample.

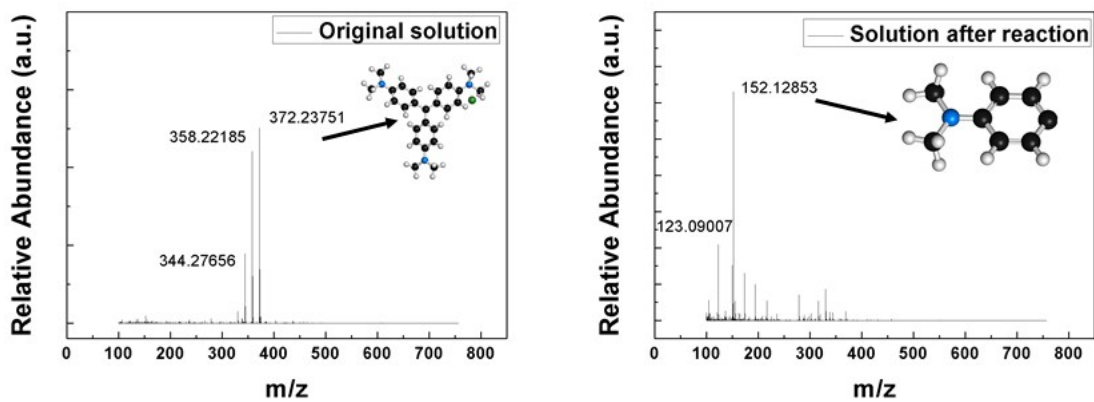

**Figure S3.** MS spectra of CV(aq), before and after prolonged irradiation for GO/Ag/Ag<sub>2</sub>S-TiO<sub>2</sub> NRAs and related molecular structures.

**Table S1** Degradation efficiency of different Ag and Ag<sub>2</sub>S decorated cycle numbers combination (5 μM MO under visible light)

| Ag <sub>2</sub> S\Ag (cycles) | 5     | 10    | 15    | 20    |
|-------------------------------|-------|-------|-------|-------|
| 10                            | 0.228 | 0.239 | 0.201 | 0.192 |
| 20                            | 0.161 | 0.259 | 0.202 | 0.206 |
| 30                            | 0.149 | 0.214 | 0.190 | 0.170 |
| 40                            | 0.143 | 0.176 | 0.162 | 0.140 |

**Table S2** The calculated values of all elements through fitting of the experimental impedance spectra based upon the proposed equivalent circuit in Figure 5(d)

| Sample                                       | $R_0$ | $Q_1$                 |       | $R_1$ | $Q_2$                 |       | $R_2$ | $Q_3$                 |       | $R_3$ | $Q_4$                 |       | $R_4$ |
|----------------------------------------------|-------|-----------------------|-------|-------|-----------------------|-------|-------|-----------------------|-------|-------|-----------------------|-------|-------|
|                                              |       | $Y_1$                 | $n_1$ |       | $Y_2$                 | $n_2$ |       | $CPE2-P$              | $Y_3$ |       | $n_3$                 | $Y_4$ |       |
| <b>TiO<sub>2</sub></b>                       | 2.55  | $3.19 \times 10^{-7}$ | 0.917 | 15.5  | $2.40 \times 10^{-6}$ | 0.773 | 809   | $2.14 \times 10^{-5}$ | 0.928 | 5390  | --                    | --    | --    |
| <b>Ag- TiO<sub>2</sub></b>                   | 2.91  | $4.43 \times 10^{-7}$ | 0.853 | 10.8  | $1.18 \times 10^{-5}$ | 0.727 | 337   | $1.24 \times 10^{-4}$ | 0.948 | 958   | --                    | --    | --    |
| <b>Ag<sub>2</sub>S-TiO<sub>2</sub></b>       | 2.95  | $6.90 \times 10^{-7}$ | 0.825 | 11.8  | $8.54 \times 10^{-6}$ | 0.790 | 89.3  | $9.37 \times 10^{-5}$ | 0.976 | 2685  |                       |       |       |
| <b>Ag/Ag<sub>2</sub>S-TiO<sub>2</sub></b>    | 3.11  | $2.18 \times 10^{-7}$ | 0.927 | 9.41  | $2.86 \times 10^{-5}$ | 0.613 | 454.9 | $1.51 \times 10^{-4}$ | 0.919 | 747   | $2.79 \times 10^{-3}$ | 0.680 | 696   |
| <b>GO/Ag/Ag<sub>2</sub>S-TiO<sub>2</sub></b> | 3.05  | $3.92 \times 10^{-7}$ | 0.871 | 21.2  | $1.34 \times 10^{-4}$ | 0.928 | 674   | $3.87 \times 10^{-4}$ | 0.570 | 18.6  | $1.60 \times 10^{-3}$ | 0.760 | 1011  |
